# Supplementary material for: Small-molecule fluorescent probes for bioactive species in inflammatory disease: arthritis, pneumonia and hepatitis
Source: Royal Society of Chemistry journal article supplement (doi:10.1039/d3an01289a), 2023-01-01
Supplement: d3an01289a1.pdf [file d3an01289a1.pdf]

## **Small-molecule fluorescent probes for bioactive species in inflammatory disease: arthritis, pneumonia and hepatitis**

Xiaolei Zhang,<sup>#a</sup> Fuyan Tang,<sup>#a</sup> Wei Shu,<sup>c</sup> Dongpeng Li,<sup>a</sup> Yuying Liu,<sup>a</sup> Haibin Xiao,<sup>\*ab</sup>  
Jin Zhou<sup>\*a</sup> and Ping Li<sup>\*b</sup>

*<sup>a</sup>School of Chemistry and Chemical Engineering, Shandong University of Technology,  
Zibo 255000, P. R. China.*

*<sup>b</sup>College of Chemistry, Chemical Engineering and Materials Science, Shandong  
Provincial Key Laboratory of Clean Production of Fine Chemicals, Shandong Normal  
University, Jinan 250014, P. R. China.*

*<sup>c</sup>School of Life Sciences and Medicine, Shandong University of Technology, Zibo  
255000, P. R. China.*

*<sup>#</sup>These authors contributed equally.*

E-mails: haibinxiao@sdut.edu.cn; zhoujin@sdut.edu.cn; lip@sdsu.edu.cn.

**Table S1** The summary of inflammation-related fluorescent probes.

| Probe No. | Target species                                                       | $\lambda_{ex}(\lambda_{Abs})/\lambda_{em}$ (nm) | Response mechanism        | Detection limit                              | Ref. | Application |
|-----------|----------------------------------------------------------------------|-------------------------------------------------|---------------------------|----------------------------------------------|------|-------------|
| 1         | Cys                                                                  | 520/575                                         | Michael addition reaction | 0.09 $\mu$ M                                 | 57   | Arthritis   |
| 2         | ONOO <sup>-</sup>                                                    | 410/468(526)                                    | FRET                      | 11.6 nM                                      | 58   |             |
| 3a        | ONOO <sup>-</sup>                                                    | 480/564(700)                                    | Oxidation reaction        | 28.06 nM                                     | 59   |             |
| 3b        | ONOO <sup>-</sup>                                                    | 480/564(808)                                    | Oxidation reaction        | 652.03 nM                                    |      |             |
| 4         | ONOO <sup>-</sup>                                                    | 390/505(745)                                    | Oxidation reaction        | 13 nM                                        | 60   |             |
| 5         | ONOO <sup>-</sup>                                                    | 490/632                                         | ESIPT and AIE             | 10 nM                                        | 61   |             |
| 6         | HClO                                                                 | 620/655                                         | Oxidation reaction        | 30 nM                                        | 62   |             |
| 7         | HClO                                                                 | 808/936(1237)                                   | ICT                       | 55 nM                                        | 63   |             |
| 8         | HClO                                                                 | 430/580                                         | Oxidation reaction        | 24 nM                                        | 64   |             |
| 9         | HClO                                                                 | 650/732                                         | Oxidation reaction        | 35 nM                                        | 65   |             |
| 10        | HClO                                                                 | 560/590                                         | Oxidation reaction        | 12 nM                                        | 66   |             |
| 11a       | HClO                                                                 | 620/669                                         | Oxidation reaction        | 20.4 nM                                      | 67   |             |
| 11b       | HClO                                                                 | 620/669                                         | Oxidation reaction        | 11.1 nM                                      |      |             |
| 12        | HClO                                                                 | 610/669                                         | Oxidation reaction        | 10.8 nM                                      | 68   |             |
| 13        | HClO                                                                 | 450/550                                         | Oxidation reaction        | 6.5 nM                                       | 69   |             |
| 14        | HClO                                                                 | 440/520                                         | ICT                       | 8.3 nM                                       | 70   |             |
| 15        | ClO <sup>-</sup>                                                     | 385/500                                         | PET                       | Not mentioned                                | 71   |             |
| 16        | HClO                                                                 | 415/550(680)                                    | ICT                       | 33.9 nM                                      | 72   |             |
| 17        | ONOO <sup>-</sup><br>ClO <sup>-</sup><br><sup>1</sup> O <sub>2</sub> | 600/675<br>600/713<br>600/713                   | ICT                       | 0.97 $\mu$ M<br>0.17 $\mu$ M<br>0.20 $\mu$ M | 73   |             |
| 18        | HBrO                                                                 | 395/460                                         | Oxidation reaction        | 30.6 nM                                      | 74   |             |
| 19        | NO                                                                   | 448/656                                         | AIE                       | 90 nM                                        | 75   |             |

|            |                                           |                              |                                |               |    |           |
|------------|-------------------------------------------|------------------------------|--------------------------------|---------------|----|-----------|
| <b>20</b>  | HNO                                       | 680/730                      | Aminolysis reaction            | 50 nM         | 77 | Pneumonia |
| <b>21</b>  | H <sub>2</sub> S                          | 502/680                      | ICT                            | 0.18 μM       | 78 |           |
| <b>22</b>  | O <sub>2</sub> <sup>-</sup>               | 450/556                      | Oxidation reaction             | 0.047 nM      | 80 |           |
| <b>23</b>  | O <sub>2</sub> <sup>-</sup>               | 482/565                      | ICT                            | 0.24 μM       | 81 |           |
| <b>24</b>  | NO                                        | 463/661                      | Oxidation elimination reaction | 17 nM         | 82 |           |
| <b>25</b>  | LTA <sub>4</sub> H                        | 320(690)/400                 | Hydrolysis reaction            | 0.2183 ng/mL  | 83 |           |
| <b>26</b>  | LTA <sub>4</sub> H                        | 670/710                      | ICT                            | 0.42 μg/mL    | 84 |           |
| <b>27a</b> | ONOO <sup>-</sup>                         | 360/460                      | Oxidation reaction             | 97 nM         | 85 |           |
| <b>27b</b> | Cys                                       | 520/590                      | Michael addition reaction      | 0.28 μM       |    |           |
| <b>28</b>  | SO <sub>2</sub>                           | 550/660                      | 1,4-addition reaction          | 1.49 nM       | 86 |           |
| <b>29</b>  | Esterase<br>N <sub>2</sub> H <sub>4</sub> | 390/571(466)<br>390/571(466) | ICT                            | Not mentioned | 88 |           |
| <b>30</b>  | Sec                                       | 610/750(800)                 | ICT                            | 90 nM         | 89 |           |
| <b>31</b>  | Sec                                       | 600/744(780)                 | ICT                            | 3 nM          | 90 |           |
| <b>32</b>  | polarity                                  | 582-646/635-743              | ICT                            |               | 91 |           |
| <b>33a</b> | lipid droplet                             | 405/550                      | ICT                            |               | 92 |           |
| <b>33b</b> |                                           | 405/552                      |                                |               |    |           |
| <b>33c</b> |                                           | 405/547                      |                                |               |    |           |
| <b>34</b>  | Cys                                       | 660/712                      | ICT                            | 82 nM         | 93 |           |
